# Supplementary material for: Role of transition metals in a charge transfer mechanism and oxygen removal in Li1.17Ni0.17Mn0.5Co0.17O2: experimental and first-principles analysis
Source: Royal Society of Chemistry journal article supplement (doi:10.1039/c8cp03148g), 2018-01-01
Supplement: c8cp03148g1.pdf [file c8cp03148g1.pdf]

## Supporting Information

### Role of Transitions Metals in Charge Transfer Mechanism and Oxygen Evolution in $\text{Li}_{1.17}\text{Ni}_{0.17}\text{Mn}_{0.5}\text{Co}_{0.17}\text{O}_2$ : Experimental and First-Principle Analysis

Tanmay Sarkar,<sup>\*,†,‡</sup> Kunkanadu R. Prakasha,<sup>†,‡</sup> Mridula Dixit Bharadwaj,<sup>‡</sup> Annigere S. Prakash<sup>†,\*</sup>

<sup>\*</sup>Center for Study of Science, Technology and Policy (CSTEP), Bangalore 560094, India.

<sup>†</sup>CSIR – Network Institutes of Solar Energy (CSIR – NISE), CSIR – Central Electrochemical Research Institute-Chennai Unit, CSIR Madras Complex, Taramani, Chennai 600113, India.

<sup>‡</sup>Academy of Scientific and Innovative Research (AcSIR), CSIR – Central Electrochemical Research Institute-Chennai Unit, CSIR Madras Complex, Taramani, Chennai 600113, India.

**Table S1.** Structural parameters obtained from Rietveld refinement of XRD data for  $\text{Li}_2\text{MnO}_3$  phases with monoclinic (C2/m) symmetry.

| $\text{Li}_2\text{MnO}_3$ |      |                   |        |        |           |
|---------------------------|------|-------------------|--------|--------|-----------|
| Space group : C2/m        |      |                   |        |        |           |
| Element                   | Site | Wyckoff positions |        |        | Occupancy |
| Li                        | 4g   | 0                 | 0.5    | 0      | 0.4315    |
| Mn                        | 4g   | 0                 | 0.5    | 0      | 0.4372    |
| Li                        | 4g   | 0                 | 0      | 0.5    | 0.999     |
| Li                        | 2b   | 0                 | 0.5783 | 0.5    | 0.9713    |
| Li                        | 2b   | 0                 | 0.1660 | 0      | 0.4885    |
| Mn                        | 2b   | 0                 | 0.1660 | 0      | 0.6057    |
| O                         | 2c   | 0.2785            | 0      | 0.2068 | 1.1628    |
| O                         | 4h   | 0.2364            | 0.3479 | 0.2374 | 1.7452    |

a = 4.927841 Å, b = 8.528829 Å, c = 5.022231 Å,  $\beta$  = 109.2°

**Table S2.** Structural parameters obtained from two phase Rietveld refinement of XRD data for  $\text{Li}_{1.17}\text{Ni}_{0.17}\text{Mn}_{0.5}\text{Co}_{0.17}\text{O}_2$  material.

| Pristine $\text{Li}_{1.17}\text{Ni}_{0.17}\text{Mn}_{0.5}\text{Co}_{0.17}\text{O}_2$        |      |                   |        |        |           |
|---------------------------------------------------------------------------------------------|------|-------------------|--------|--------|-----------|
| Phase 1: $\text{LiNi}_{1/3}\text{Mn}_{1/3}\text{Co}_{1/3}\text{O}_2 (R\bar{3}m)$            |      |                   |        |        |           |
| Element                                                                                     | Site | Wyckoff positions |        |        | Occupancy |
| Li1                                                                                         | 3b   | 0                 | 0      | 0      | 0.9760    |
| Ni1                                                                                         | 3b   | 0                 | 0      | 0      | 0.0241    |
| Li2                                                                                         | 3a   | 0                 | 0      | 0.5    | 0.0200    |
| Ni2                                                                                         | 3a   | 0                 | 0      | 0.5    | 0.3100    |
| Mn1                                                                                         | 3a   | 0                 | 0      | 0.5    | 0.3350    |
| Co1                                                                                         | 3a   | 0                 | 0      | 0.5    | 0.3366    |
| O1                                                                                          | 6c   | 0                 | 0      | 0.2440 | 1.0000    |
| $a = 2.8487\text{\AA}$ $c = 14.2216\text{\AA}$                                              |      |                   |        |        |           |
| Phase 2: $\text{Li}_2\text{MnO}_3 (C2/m)$                                                   |      |                   |        |        |           |
| Element                                                                                     | Site | Wyckoff positions |        |        | Occupancy |
| Li1                                                                                         | 2b   | 0                 | 0.5    | 0      | 0.8516    |
| Mn1                                                                                         | 2b   | 0                 | 0.5    | 0      | 0.1261    |
| Li2                                                                                         | 2c   | 0                 | 0      | 0.5    | 1.0080    |
| Li3                                                                                         | 4h   | 0                 | 0.7149 | 0.5    | 1.1811    |
| Mn2                                                                                         | 4h   | 0                 | 0.6740 | 0.5    | 0.0286    |
| Li4                                                                                         | 4g   | 0                 | 0.0870 | 0      | 0.0840    |
| Mn3                                                                                         | 4g   | 0                 | 0.1795 | 0      | 0.8507    |
| O1                                                                                          | 6c   | 0.2458            | 0      | 0.2130 | 1.0600    |
| O2                                                                                          | 8j   | 0.2491            | 0.3281 | 0.2429 | 2.0000    |
| $a = 4.9540\text{\AA}$ $b = 8.5153\text{\AA}$ $c = 5.0094\text{\AA}$ $\beta = 108.88^\circ$ |      |                   |        |        |           |
| Rwp = 10.2   Rp = 15.6   Chi 2 = 2.26                                                       |      |                   |        |        |           |

Formation energy of Conf 5, Conf 6 and Conf 7 is -23.43, -23.40 and -23.36 eV/f.u respectively.

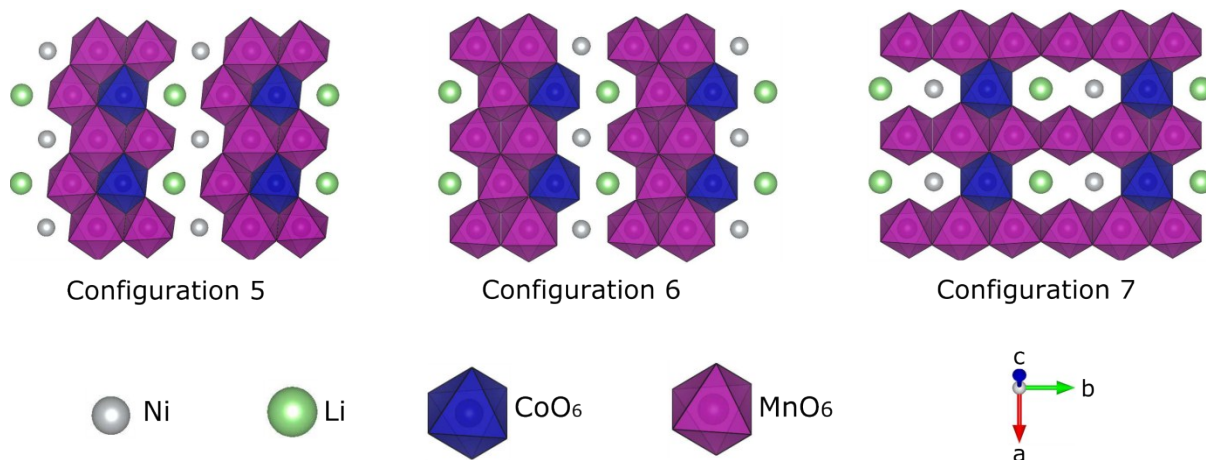

Figure S1: (a) Possible atomic arrangements of 3d metals in LiM<sub>2</sub> layer showing different configurations of Li<sub>1.17</sub>Ni<sub>0.17</sub>Mn<sub>0.5</sub>Co<sub>0.17</sub>O<sub>2</sub>.

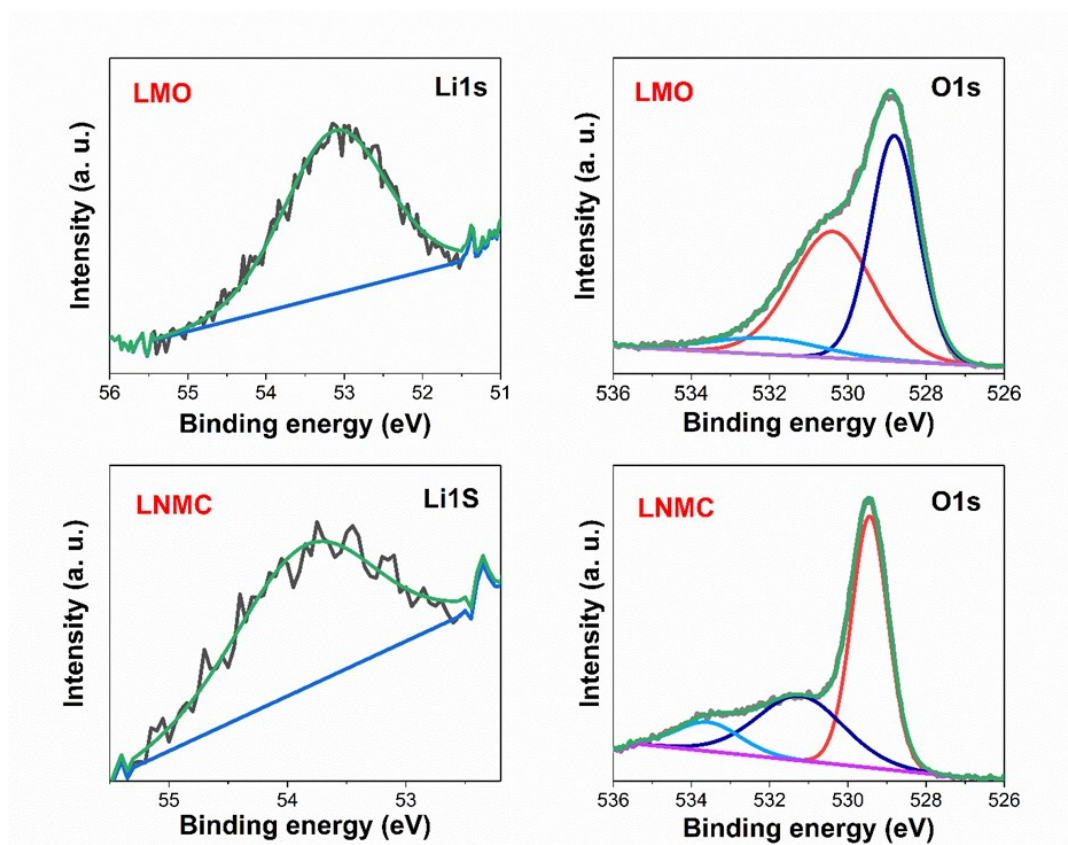

Figure S2: Core level XPS spectra of Li 1s and O 1s peaks for both LMO and LNMC samples.
